# Supplementary material
Source: PubMed Central journal article supplement (PMC3805071)
Supplement: CJN.03640413_CJN03640413SupplementaryData.pdf [file CJN.03640413_CJN03640413SupplementaryData.pdf]

## Kidney Research National Dialogue

Breyer, Matthew D.  
Biotherapeutics Discovery Research  
Lilly Research Laboratories  
Indianapolis, IN

Sedor, John R.  
Department of Medicine  
Case Western Reserve University  
Cleveland, OH

Coffman, Thomas M.  
Department of Medicine  
Duke University and VA Medical Centers  
Durham, NC

Susztak, Katalin  
Department of Medicine  
University of Pennsylvania  
Philadelphia, PA

Flessner, Michael F.  
National Institutes of Health  
National Institute of Diabetes and Digestive and Kidney  
Diseases  
Bethesda, MD 20892

Fried, Linda F.  
Renal Section  
VA Pittsburgh Healthcare System and  
Departments of Medicine and Epidemiology  
University of Pittsburgh  
Pittsburgh, PA

Harris, Raymond C.  
Department of Medicine  
Vanderbilt University  
Nashville, TN

Ketchum, Christian J.  
National Institutes of Health  
National Institute of Diabetes and Digestive and Kidney  
Diseases  
Bethesda, MD 20892

Kretzler, Matthias  
Department of Internal Medicine  
University of Michigan Medical School  
Ann Arbor, MI

Nelson, Robert G.  
National Institutes of Health  
National Institute of Diabetes and Digestive and Kidney  
Diseases  
Phoenix, AZ
